# Supplementary material for: Identifying Priority Areas for Conservation: A Global Assessment for Forest-Dependent Birds
Source: PLoS One. 2011 Dec 19;6(12):e29080. doi: 10.1371/journal.pone.0029080 (PMC3242781; doi:10.1371/journal.pone.0029080)
Supplement: Table S1 — Excel file of summary data by ecoregions, showing realm, ranking within realm for maximum impact score, maximum and mean impact scores, species richness of forest birds, recent (2000–2005) deforestation and the percentage of forest within protected areas. (XLS) [file pone.0029080.s006.xls]

## Sheet: Table S1
Table S1. Excel file of summary data by ecoregions, showing realm, ranking within realm for maximum impact score, maximum and mean impact scores, species richness of forest birds, recent (2000-2005) deforestation and the percentage of forest within protected areas.
Ecoregion	Realm	Rank by realm	Forest area (km2)	Max impact score	Species count	Mean rate of loss (%)	% forest in PA	% forest in IBA
Brigalow tropical savanna	AA	1	134725	1.33333	97	0.456	4.81	0.52
Sumba deciduous forests	AA	2	750	1.07655	52	0	0	53.33
Halmahera rain forests	AA	3	25850	1.07167	94	1.236	0.48	11.12
Solomon Islands rain forests	AA	4	33850	1.06312	66	0.277	0	0
Rakiura Island temperate forests	AA	5	875	1.03205	11	0	85.71	0
Nelson Coast temperate forests	AA	6	13000	1.00509	10	0.473	46.73	0
Louisiade Archipelago rain forests	AA	7	950	1.00166	31	0	0	0
Northland temperate kauri forests	AA	8	4225	0.701584	15	0.119	36.69	0
Vanuatu rain forests	AA	9	4800	0.5818	23	0.004	0	0
Southwest Australia woodlands	AA	10	26150	0.504914	26	1.103	17.69	6.02
Vogelkop-Aru lowland rain forests	AA	11	75025	0.394355	274	0.919	0.53	1.6
Sulawesi montane rain forests	AA	12	74025	0.375924	133	0.976	7.9	13.51
Arnhem Land tropical savanna	AA	13	116200	0.335457	59	0.354	16.76	36.83
Banda Sea Islands moist deciduous forests	AA	14	4025	0.330925	83	0.268	1.24	50.31
Timor and Wetar deciduous forests	AA	15	7875	0.30895	82	0.048	0.63	25.08
Tasmanian Central Highland forests	AA	16	14475	0.261989	22	0.487	28.84	11.23
Tasmanian temperate forests	AA	17	16350	0.254183	22	1.188	8.41	12.84
Lesser Sundas deciduous forests	AA	18	22175	0.252399	105	0.184	4.74	15.78
Seram rain forests	AA	19	18575	0.236805	80	1.066	0	16.96
Sulawesi lowland rain forests	AA	20	87800	0.21796	165	1.021	3.27	8.23
New Caledonia rain forests	AA	21	6825	0.203389	16	0.222	3.3	41.39
New Guinea mangroves	AA	22	22200	0.196525	239	0.661	13.63	0
Biak-Numfoor rain forests	AA	23	2650	0.196525	48	0.637	0	0
Buru rain forests	AA	24	8600	0.174111	69	0.976	0	16.57
New Britain-New Ireland lowland rain forests	AA	25	33175	0.168186	88	0.796	0	0
New Britain-New Ireland montane rain forests	AA	26	12175	0.127219	68	0.215	0	0
Admiralty Islands lowland rain forests	AA	27	1775	0.115672	26	0	0	0
New Caledonia dry forests	AA	28	200	0.11054	10	0	0	12.5
Southern New Guinea freshwater swamp forests	AA	29	98525	0.101039	236	0.861	2.13	0
Southern New Guinea lowland rain forests	AA	30	122500	0.100998	266	0.921	4.27	0
Central Range sub-alpine grasslands	AA	31	14500	0.0991745	221	0.539	24.66	0
Central Range montane rain forests	AA	32	169600	0.0980592	346	0.568	11.94	0
Vogelkop montane rain forests	AA	33	21800	0.0961622	265	0.843	2.87	0
Trobriand Islands rain forests	AA	34	3475	0.0764102	76	0.331	0	0
Fiordland temperate forests	AA	35	7825	0.0718268	12	0.283	84.98	0
Northern New Guinea montane rain forests	AA	36	23100	0.0674857	247	0.739	15.04	0
Northern New Guinea lowland rain and freshwater swamp forests	AA	37	133950	0.0529292	263	0.622	12.67	0
Huon Peninsula montane rain forests	AA	38	16000	0.0510206	260	0.361	0	0
Queensland tropical rain forests	AA	39	31900	0.0317583	94	0.628	36.68	31.19
Einasleigh upland savanna	AA	40	60400	0.0315696	92	0.321	3.23	0.5
Chatham Island temperate forests	AA	41	525	0.0315625	2	0	0	0
Southeastern Papuan rain forests	AA	42	75900	0.0296673	314	0.261	0	0
Eastern Australian temperate forests	AA	43	173650	0.0196641	78	0.631	19.22	13.62
Yapen rain forests	AA	44	2150	0.0194265	101	0.287	0	0
North Island temperate forests	AA	45	28375	0.0185851	13	0.85	40.88	0
Pilbara shrublands	AA	46	1075	0.0162271	20	0	0	0
Tasmanian temperate rain forests	AA	47	29850	0.0160515	21	0.651	44.72	19.43
Carnarvon xeric shrublands	AA	48	525	0.0157694	17	0	0	4.76
Southeast Australia temperate forests	AA	49	132550	0.0152466	59	0.611	19.8	13.05
Jarrah-Karri forest and shrublands	AA	50	9850	0.0146843	23	1.062	28.43	0.25
Kimberly tropical savanna	AA	51	131850	0.0144291	59	0.134	2.81	7.93
Southwest Australia savanna	AA	52	6900	0.0119298	24	0.086	4.71	20.65
Southeast Australia temperate savanna	AA	53	65400	0.0108764	59	0.209	2.98	15.29
Cape York Peninsula tropical savanna	AA	54	99575	0.0101988	102	0.699	11.6	7.41
Trans Fly savanna and grasslands	AA	55	26300	0.0100966	144	0.318	0	0
South Island montane grasslands	AA	56	6625	0.0099475	12	0.066	53.96	0
Westland temperate forests	AA	57	4025	0.00932677	11	0.058	63.35	0
South Island temperate forests	AA	58	1550	0.00906877	9	0.056	70.97	0
Esperance mallee	AA	59	59550	0.00887779	23	5.548	15.24	9.66
Naracoorte woodlands	AA	60	7850	0.00824954	32	0.426	9.24	6.69
Richmond temperate forests	AA	61	6175	0.00739886	11	0.924	48.18	0
Australian Alps montane grasslands	AA	62	12400	0.00652841	46	1.851	61.49	57.46
Western Australian Mulga shrublands	AA	63	4975	0.00551845	15	0	3.52	0
Central Ranges xeric scrub	AA	64	4900	0.00545309	14	0	5.61	0
Great Victoria desert	AA	65	1350	0.00508664	10	0	5.56	0
Swan Coastal Plain Scrub and Woodlands	AA	66	5275	0.00483925	22	0.324	8.53	26.54
Carpentaria tropical savanna	AA	67	108575	0.00480356	69	0.134	4.35	11.12
Murray-Darling woodlands and mallee	AA	68	13400	0.00411207	34	0.078	34.33	60.45
Mount Lofty woodlands	AA	69	4900	0.00352308	26	0.099	15.82	45.92
Cantebury-Otago tussock grasslands	AA	70	1350	0.00347563	8	0.007	20.37	0
Victoria Plains tropical savanna	AA	71	80075	0.00312199	44	0.119	2.56	3.9
Eyre and York mallee	AA	72	4525	0.00267132	22	0.028	28.18	7.18
Eastern Australia mulga shrublands	AA	73	8150	0.00258774	33	0.057	14.11	4.29
Coolgardie woodlands	AA	74	87250	0.00225797	19	2.113	9.08	1.23
Mitchell grass downs	AA	75	13275	0.0019772	40	0.01	7.53	9.79
Tirari-Sturt stony desert	AA	76	1350	0.00179845	20	0	24.07	38.89
Nullarbor Plains xeric shrublands	AA	77	475	0.00139416	13	0	10.53	0
Great Sandy-Tanami desert	AA	78	1475	0.00102141	20	0.057	0	6.78
Simpson desert	AA	79	225	0.000360292	15	0	0	11.11
Gibson desert	AA	80	225	0.000168621	7	0	11.11	0
Sao Tome, Principe and Annobon moist lowland forests	AT	1	850	1.77608	26	0	0	26.47
Mascarene forests	AT	2	1150	1.69048	10	0.087	10.87	30.43
Mount Cameroon and Bioko montane forests	AT	3	1175	1.01757	277	2.395	10.64	76.6
Comoros forests	AT	4	1725	0.808572	24	0.497	0	20.29
Eastern Arc forests	AT	5	18675	0.681584	183	1.246	10.84	7.36
Western Guinean lowland forests	AT	6	91025	0.261596	248	0.256	6.37	24.72
Angolan Miombo woodlands	AT	7	525100	0.22398	217	0.414	2.06	3.38
Northern Zanzibar-Inhambane coastal forest mosaic	AT	8	82775	0.196959	173	1.009	2.69	9.76
Somali montane xeric woodlands	AT	9	1450	0.171486	28	0.073	0	34.48
Somali Acacia-Commiphora bushlands and thickets	AT	10	8400	0.170996	115	0.002	4.76	27.98
Ethiopian montane forests	AT	11	37375	0.170996	97	0.063	6.49	12.44
Northern Acacia-Commiphora bushlands and thickets	AT	12	21650	0.170027	208	0.02	3	7.74
Cameroonian Highlands forests	AT	13	35125	0.159309	326	0.524	5.55	18.86
Madagascar subhumid forests	AT	14	43600	0.159131	92	0.111	8.94	15.25
Madagascar dry deciduous forests	AT	15	47525	0.152613	81	0.105	4.63	23.51
Albertine Rift montane forests	AT	16	82450	0.145262	390	0.451	9.82	37.9
Southern Acacia-Commiphora bushlands and thickets	AT	17	24750	0.132604	233	0.051	5.56	13.74
Madagascar succulent woodlands	AT	18	16175	0.111559	61	0.078	5.72	8.04
Madagascar spiny thickets	AT	19	4575	0.105809	82	0.314	1.64	36.07
South Malawi montane forest-grassland mosaic	AT	20	5100	0.0845979	124	0.225	5.88	11.76
Eastern Miombo woodlands	AT	21	338225	0.0796023	184	0.489	9.25	8.13
Cross-Sanaga-Bioko coastal forests	AT	22	49775	0.0752911	318	0.798	10.75	19.74
Angolan scarp savanna and woodlands	AT	23	48550	0.0733424	205	0.419	0	7.93
Ethiopian xeric grasslands and shrublands	AT	24	375	0.0666667	1	0	0	26.67
Angolan montane forest-grassland mosaic	AT	25	23850	0.0642189	123	0.5	0	7.44
Southwestern Arabian montane woodlands	AT	26	875	0.0594018	13	0	0	20
Southwestern Arabian foothills savanna	AT	27	6600	0.0572054	15	0	0	1.89
Madagascar mangroves	AT	28	3150	0.0557699	64	0	0	50.79
Guinean montane forests	AT	29	20200	0.052216	247	0.236	0.87	5.32
Southern Zanzibar-Inhambane coastal forest mosaic	AT	30	135025	0.0461528	138	0.894	0.37	4.72
Zambezian flooded grasslands	AT	31	67150	0.0447658	182	0.392	30.23	42.03
Madagascar lowland forests	AT	32	84600	0.0395816	87	0.45	6.68	9.9
Granitic Seychelles forests	AT	33	200	0.0372398	5	0	0	25
Northeastern Congolian lowland forests	AT	34	525400	0.0334324	380	0.369	8.25	5.76
Rwenzori-Virunga montane moorlands	AT	35	2275	0.0328069	298	0.089	47.25	68.13
Madagascar ericoid thickets	AT	36	525	0.0322004	71	0.052	19.05	23.81
Northern Congolian forest-savanna mosaic	AT	37	662700	0.0276949	379	0.501	12.22	5.94
East African montane forests	AT	38	34900	0.0259735	238	0.245	12.32	41.62
Victoria Basin forest-savanna mosaic	AT	39	73200	0.0254064	344	0.167	7.65	15.61
Ethiopian montane grasslands and woodlands	AT	40	23925	0.0247871	96	0.1	10.55	6.79
Southern Congolian forest-savanna mosaic	AT	41	537425	0.0236752	344	0.48	1.63	0.79
East African montane moorlands	AT	42	2250	0.0222438	142	0.384	30	74.44
East African mangroves	AT	43	13650	0.0212076	126	0.3	0	17.4
Central Zambezian Miombo woodlands	AT	44	930100	0.0195416	296	0.468	9.3	6.59
Ethiopian montane moorlands	AT	45	1500	0.0185503	89	0.035	36.67	3.33
Southern Rift montane forest-grassland mosaic	AT	46	24775	0.0156613	145	0.334	8.78	16.65
East Sudanian savanna	AT	47	409625	0.0149386	324	0.23	10.38	12.07
Guinean forest-savanna mosaic	AT	48	427375	0.014396	316	0.282	3.53	5.38
Western Congolian forest-savanna mosaic	AT	49	350400	0.0121157	304	0.407	0.92	4.35
Southern Miombo woodlands	AT	50	273425	0.0111295	144	0.82	6.52	4.76
Central Congolian lowland forests	AT	51	412550	0.011009	226	0.256	8.22	8.77
Eastern Congolian swamp forests	AT	52	91250	0.0109595	227	0.345	0.71	1.04
Eastern Zimbabwe montane forest-grassland mosaic	AT	53	7300	0.0108033	117	0.514	2.4	5.82
Serengeti volcanic grasslands	AT	54	1250	0.00934382	106	0.009	4	34
Zambezian Baikiaea woodlands	AT	55	71400	0.00893793	89	0.294	22.79	23.28
Zambezian and Mopane woodlands	AT	56	261325	0.00892134	156	1.182	10.25	12.78
Central African mangroves	AT	57	26925	0.00848492	294	0.533	0	2.69
Eastern Guinean forests	AT	58	65075	0.0083714	249	0.198	2.84	10.83
Nigerian lowland forests	AT	59	42925	0.008319	217	0.533	1.92	4.78
Atlantic Equatorial coastal forests	AT	60	183850	0.00679302	283	0.621	4.61	13.71
Guinean mangroves	AT	61	15800	0.00645067	222	0	0	18.99
Northwestern Congolian lowland forests	AT	62	430075	0.00628605	305	0.438	8.51	13.18
East African halophytics	AT	63	75	0.00392878	60	0	0	0
Drakensberg montane grasslands, woodlands and forests	AT	64	123825	0.00387412	113	0.438	2.56	11.81
Maputaland-Pondoland bushland and thickets	AT	65	17900	0.00387412	91	0.367	0.28	5.03
KwaZulu-Cape coastal forest mosaic	AT	66	14975	0.00383125	93	0.188	1.84	4.34
Zambezian coastal flooded savanna	AT	67	13550	0.00355355	104	1.125	0.37	22.32
Southern Africa bushveld	AT	68	98950	0.00316726	108	0.567	4.14	11.09
Knysna-Amatole montane forests	AT	69	2525	0.00308519	58	0.093	0.99	56.44
Western Congolian swamp forests	AT	70	127100	0.00300628	253	0.299	3.4	25.51
Cross-Niger transition forests	AT	71	10925	0.00297305	202	0.082	0	0
Niger Delta swamp forests	AT	72	14125	0.00285015	187	1.076	0	1.59
Angolan Mopane woodlands	AT	73	3125	0.00276219	68	0.011	16	27.2
Albany thickets	AT	74	7550	0.00260183	57	0.207	11.59	9.27
Montane fynbos and renosterveld	AT	75	12725	0.00258097	53	0.553	16.5	40.47
Lowland fynbos and renosterveld	AT	76	10600	0.00255795	55	0.855	2.36	28.07
Nama Karoo	AT	77	3075	0.00251298	56	0.026	4.07	0
Southern Africa mangroves	AT	78	900	0.00244673	91	0	11.11	11.11
Maputaland coastal forest mosaic	AT	79	29300	0.00235317	96	1.615	8.11	9.3
Highveld grasslands	AT	80	4275	0.00228523	63	0.037	0	51.46
Drakensberg alti-montane grasslands and woodlands	AT	81	1950	0.00226115	47	0.157	17.95	20.51
Kalahari Acacia-Baikiaea woodlands	AT	82	32250	0.00206156	65	0.067	5.58	8.91
West Sudanian savanna	AT	83	272450	0.00200156	177	0.079	12.1	15.58
Arabian Peninsula coastal fog desert	AT	84	100	0.0017331	4	0	0	0
Kalahari xeric savanna	AT	85	1350	0.00159363	35	0	0	24.07
Zambezian halophytics	AT	86	7175	0.00132663	84	6.435	0.7	0.7
Zambezian Cryptosepalum dry forests	AT	87	30300	0.00121527	95	0.476	12.46	13.94
Itigi-Sumbu thicket	AT	88	3900	0.00117105	96	0.117	25.64	0
Saharan flooded grasslands	AT	89	4425	0.000878291	51	0	0	15.25
Jos Plateau forest-grassland mosaic	AT	90	425	0.000766851	85	0	0	0
Western Zambezian grasslands	AT	91	11775	0.00076056	87	0.169	2.12	0.85
Succulent Karoo	AT	92	575	0.000682732	34	0	0	0
Sahelian Acacia savanna	AT	93	750	0.000378316	40	0	0	10
Inner Niger Delta flooded savanna	AT	94	75	4.07486e-05	4	0	0	0
Lake Chad flooded savanna	AT	95	25	4.86112e-06	3	0	0	0
South Western Ghats montane rain forests	IM	1	22625	1.00807	138	0.924	10.39	17.02
Greater Negros-Panay rain forests	IM	2	7750	1.00658	126	0.056	5.48	26.77
Luzon rain forests	IM	3	33450	1.00022	161	0.211	2.99	25.34
Palawan rain forests	IM	4	9350	0.538304	107	0.579	49.47	39.84
Eastern Himalayan broadleaf forests	IM	5	75275	0.513887	421	0.586	5.94	20.19
Mindoro rain forests	IM	6	3050	0.500995	95	0.102	8.2	52.46
Sulu Archipelago rain forests	IM	7	1100	0.477375	71	0	0	9.09
Nicobar Islands rain forests	IM	8	1050	0.369309	40	0.019	45.24	97.62
Sri Lanka lowland rain forests	IM	9	5975	0.30705	108	0.207	7.53	0
Mentawai Islands rain forests	IM	10	5875	0.301876	76	1.015	30.21	29.36
Nansei Islands subtropical evergreen forests	IM	11	2550	0.223235	36	0.149	12.75	77.45
Southern Annamites montane rain forests	IM	12	43275	0.215609	295	1.341	11.9	21.03
Sri Lanka montane rain forests	IM	13	2750	0.169447	106	0.58	10	0
Mindanao montane rain forests	IM	14	15100	0.16564	169	0.361	7.95	53.31
Western Java montane rain forests	IM	15	18200	0.164192	211	0.581	3.02	14.15
Narmada Valley dry deciduous forests	IM	16	74950	0.113028	130	0.129	5.04	3.8
Deccan thorn scrub forests	IM	17	52250	0.111911	132	0.075	0.33	5.02
Northeast India-Myanmar pine forests	IM	18	6075	0.106256	316	0.185	0	18.52
Kinabalu montane alpine meadows	IM	19	3900	0.105061	286	0.349	33.33	55.77
Northern Indochina subtropical forests	IM	20	286650	0.103459	451	0.603	5.83	7.58
Sri Lanka dry-zone dry evergreen forests	IM	21	28275	0.0952853	107	0.231	9.81	0
Mizoram-Manipur-Kachin rain forests	IM	22	77575	0.0928152	386	0.443	4.45	10.86
Mindanao-Eastern Visayas rain forests	IM	23	40550	0.0918212	181	0.209	1.11	23.12
Christmas and Cocos Islands tropical forests	IM	24	125	0.0833622	4	0	0	20
Luang Prabang montane rain forests	IM	25	39700	0.0817439	307	0.587	13.92	13.79
Luzon montane rain forests	IM	26	7425	0.0793348	152	0.55	16.5	33.33
Andaman Islands rain forests	IM	27	4350	0.076934	57	0.885	0	23.56
Luzon tropical pine forests	IM	28	6225	0.0732279	147	0.351	2.01	14.46
Eastern Himalayan subalpine conifer forests	IM	29	26925	0.068249	379	0.446	21.17	38.35
Eastern Java-Bali montane rain forests	IM	30	11375	0.0676878	185	0.532	5.49	32.09
Borneo montane rain forests	IM	31	114425	0.0510689	314	0.765	21.85	32.73
Taiwan subtropical evergreen forests	IM	32	26350	0.0483046	86	0.524	9.01	21.73
Borneo lowland rain forests	IM	33	329450	0.0431774	324	1.556	4.48	10.63
Western Java rain forests	IM	34	8325	0.0420374	193	0.117	0.3	7.81
Meghalaya subtropical forests	IM	35	28300	0.0392228	304	0.337	0.27	12.01
South Taiwan monsoon rain forests	IM	36	2175	0.0388715	82	0.298	5.75	12.64
Eastern Java-Bali rain forests	IM	37	6150	0.0377464	185	0.085	0	23.58
Himalayan subtropical pine forests	IM	38	60375	0.0369149	392	0.366	2.65	5.42
Hainan Island monsoon rain forests	IM	39	13375	0.0362326	131	1.633	7.85	10.47
Cardamom Mountains rain forests	IM	40	33600	0.0360189	196	2.05	38.84	30.58
South China-Vietnam subtropical evergreen forests	IM	41	147150	0.0356675	237	0.727	3.14	3.02
Sumatran lowland rain forests	IM	42	138800	0.0342582	348	1.231	7.65	16.03
Southeastern Indochina dry evergreen forests	IM	43	74450	0.033646	304	0.33	25.15	21.36
Northern Vietnam lowland rain forests	IM	44	6375	0.0328486	283	0.468	20	13.33
Peninsular Malaysian montane rain forests	IM	45	17350	0.0319034	326	0.892	17.29	60.23
Peninsular Malaysian rain forests	IM	46	77700	0.0317497	337	2.363	8.3	16.02
Sumatran montane rain forests	IM	47	66125	0.0316756	334	0.818	35.58	27.86
Northern Annamites rain forests	IM	48	38200	0.0305609	292	0.899	28.21	26.77
Sumatran tropical pine forests	IM	49	2550	0.030528	310	0.697	47.06	22.55
Chin Hills-Arakan Yoma montane forests	IM	50	18525	0.0299292	316	0.475	2.56	6.21
Southern Vietnam lowland dry forests	IM	51	21375	0.0294237	275	0.357	1.75	0.7
Tenasserim-South Thailand semi-evergreen rain forests	IM	52	57600	0.0257038	385	1.062	27.95	25.56
Western Himalayan broadleaf forests	IM	53	45125	0.0230457	283	0.451	3.55	9.25
Northern Triangle temperate forests	IM	54	10725	0.0215731	355	0.557	14.22	22.61
Himalayan subtropical broadleaf forests	IM	55	28825	0.0206985	387	0.386	7.37	22.46
Northern Triangle subtropical forests	IM	56	52450	0.0205412	377	0.61	10.44	18.06
South Western Ghats moist deciduous forests	IM	57	22075	0.0198142	136	0.619	15.63	22.08
Western Himalayan subalpine conifer forests	IM	58	25800	0.0186015	277	0.447	4.17	10.08
South Deccan Plateau dry deciduous forests	IM	59	44100	0.0163042	130	0.215	1.36	3.8
Northwestern thorn scrub forests	IM	60	14125	0.0155816	211	0.054	1.59	1.06
Kayah-Karen montane rain forests	IM	61	90675	0.0150562	345	1.427	16.74	14.5
Jian Nan subtropical evergreen forests	IM	62	590450	0.0133522	197	0.845	2.63	2.76
Upper Gangetic Plains moist deciduous forests	IM	63	17275	0.0119601	221	0.015	5.07	12.3
Borneo peat swamp forests	IM	64	51625	0.0118495	256	2.169	0.68	15.01
Southwest Borneo freshwater swamp forests	IM	65	25550	0.0118495	229	0.871	0	14.97
Central Indochina dry forests	IM	66	103125	0.0118163	336	0.225	16.34	28.51
Maldives-Lakshadweep-Chagos Archipelago tropical moist forests	IM	67	150	0.0117246	64	0	0	0
Irrawaddy moist deciduous forests	IM	68	74775	0.0117039	356	0.545	2.11	3.64
Khathiar-Gir dry deciduous forests	IM	69	67950	0.0116734	96	0.066	2.47	1.36
Sundaland heath forests	IM	70	45800	0.0115552	276	1.232	0.05	4.04
Chao Phraya lowland moist deciduous forests	IM	71	2675	0.0114984	271	0.16	7.48	10.28
Peninsular Malaysian peat swamp forests	IM	72	2875	0.0114621	232	4.859	0.87	43.48
Sumatran peat swamp forests	IM	73	54950	0.0113628	239	4.865	2.73	8.6
Sunda Shelf mangroves	IM	74	25500	0.0113068	296	1.806	0.88	16.37
Sumatran freshwater swamp forests	IM	75	7600	0.0112046	235	2.668	0	7.89
North Western Ghats montane rain forests	IM	76	28475	0.0111644	136	0.528	10.27	19.93
North Western Ghats moist deciduous forests	IM	77	31000	0.0111351	137	0.202	5	5.16
Myanmar coastal rain forests	IM	78	20125	0.00993339	328	0.659	0.62	0.12
Terai-Duar savanna and grasslands	IM	79	14125	0.00991751	273	0.121	10.97	26.9
Brahmaputra Valley semi-evergreen forests	IM	80	8125	0.00970688	340	0.126	1.54	35.38
Myanmar Coast mangroves	IM	81	7850	0.00905848	334	0.424	1.27	9.87
Northern Thailand-Laos moist deciduous forests	IM	82	27400	0.00839116	310	1.319	17.34	8.21
Tonle Sap freshwater swamp forests	IM	83	7025	0.00781476	141	0.155	22.42	25.62
Tonle Sap-Mekong peat swamp forests	IM	84	2425	0.0076468	150	0.018	2.06	29.9
Malabar Coast moist forests	IM	85	18475	0.00671911	133	0.201	1.08	1.08
Irrawaddy dry forests	IM	86	3850	0.00594269	201	0.051	7.14	22.73
Northern Khorat Plateau moist deciduous forests	IM	87	1400	0.00582252	205	0.145	0	8.93
Indochina mangroves	IM	88	3600	0.00450833	282	0.717	14.58	20.14
Eastern highlands moist deciduous forests	IM	89	223400	0.00401903	122	0.312	5.85	3.63
Lower Gangetic Plains moist deciduous forests	IM	90	2025	0.00394145	230	0.002	3.7	7.41
Indus Valley desert	IM	91	100	0.00375923	18	0	0	0
Sundarbans mangroves	IM	92	6675	0.00355817	68	0	0	10.11
Northern dry deciduous forests	IM	93	33875	0.0034411	115	0.24	2.58	2.88
Chhota-Nagpur dry deciduous forests	IM	94	45400	0.00319369	109	0.129	8.09	3.96
Central Deccan Plateau dry deciduous forests	IM	95	70300	0.00302557	97	0.092	1.85	6.76
East Deccan dry-evergreen forests	IM	96	2175	0.00302547	66	0.007	0	3.45
Orissa semi-evergreen forests	IM	97	3550	0.00286723	91	0.028	0	6.34
Chao Phraya freshwater swamp forests	IM	98	500	0.0023748	150	0	0	5
Goadavari-Krishna mangroves	IM	99	975	0.00209345	64	0	0	38.46
Indus River Delta-Arabian Sea mangroves	IM	100	300	0.00185859	64	0	0	0
Irrawaddy freshwater swamp forests	IM	101	225	0.00163659	110	0	0	0
Rann of Kutch seasonal salt marsh	IM	102	575	0.00063321	18	0	21.74	0
Ogilvie-MacKenzie alpine tundra	NA	1	123250	0.5	40	2.122	1.38	0
Northern Pacific coastal forests	NA	2	46350	0.142996	34	0.7	23.41	0
Sierra Madre Occidental pine-oak forests	NA	3	191575	0.0508126	194	0.432	4.71	0
Sierra Madre Oriental pine-oak forests	NA	4	44300	0.0376149	205	0.281	10.95	0
Meseta Central matorral	NA	5	22600	0.0108179	160	0.257	5.09	0
Central Mexican matorral	NA	6	29150	0.0103295	118	0.278	0.09	0
Tamaulipan matorral	NA	7	6575	0.00682588	89	0.251	3.8	0
Tamaulipan mezquital	NA	8	13700	0.00653988	77	0.057	0	0
Sonoran-Sinaloan transition subtropical dry forest	NA	9	41050	0.00582528	120	0.327	0	0
Chihuahuan desert	NA	10	71200	0.00547444	127	0.164	1.72	0
Baja California desert	NA	11	9250	0.00545892	31	0	4.32	0
Gulf of California xeric scrub	NA	12	350	0.00533389	10	0	0	0
California montane chaparral and woodlands	NA	13	19500	0.00358495	73	0.571	19.49	0
California interior chaparral and woodlands	NA	14	50500	0.0035706	76	0.378	3.66	0
Arizona Mountains forests	NA	15	95450	0.00323077	91	0.77	17.47	0
Klamath-Siskiyou forests	NA	16	50175	0.00309106	80	4.292	17.74	0
Colorado Plateau shrublands	NA	17	113375	0.0030648	91	0.258	10.06	0
Eastern Cascades forests	NA	18	54600	0.00305411	86	1.585	4.08	0
Western Gulf coastal grasslands	NA	19	25025	0.00278903	69	0.095	1.8	0
Sierra Nevada forests	NA	20	51500	0.00276004	87	1.377	22.43	0
New England-Acadian forests	NA	21	235500	0.00268338	82	2.471	3.21	0.41
California coastal sage and chaparral	NA	22	27075	0.00256533	64	0.226	3.69	0
Mojave desert	NA	23	39200	0.00249797	81	0.357	3.7	0
Western Great Lakes forests	NA	24	271425	0.00249233	70	2.455	12.44	0
Upper Midwest forest-savanna transition	NA	25	103925	0.00246038	70	0.27	1.8	0
Southern Great Lakes forests	NA	26	69625	0.00242504	68	0.165	1.54	0.14
Central and Southern Cascades forests	NA	27	44525	0.00239964	79	4.668	27.62	0
Sonoran desert	NA	28	32575	0.00237119	102	0.051	0.84	0
Great Basin shrub steppe	NA	29	132425	0.00233484	84	0.066	5.72	0
Northern California coastal forests	NA	30	12875	0.00232434	49	0.632	5.83	0
Allegheny Highlands forests	NA	31	82325	0.00230392	70	1.147	2.28	0
Eastern forest-boreal transition	NA	32	348350	0.00225472	74	3.474	7.34	0.01
Snake-Columbia shrub steppe	NA	33	91750	0.00221779	90	0.635	5.67	0
Cascade Mountains leeward forests	NA	34	42600	0.00220572	82	3.056	17.78	0
Eastern Canadian forests	NA	35	478650	0.00215198	62	3.188	2.77	0.31
Colorado Rockies forests	NA	36	129350	0.00211142	78	0.715	19.17	0
Wasatch and Uinta montane forests	NA	37	40000	0.0020898	76	0.294	8	0
British Columbia mainland coastal forests	NA	38	119450	0.0020211	82	0.945	6.01	0.4
Central Pacific coastal forests	NA	39	72000	0.00193143	61	4.764	6.7	0.87
California Central Valley grasslands	NA	40	44425	0.00182335	39	0.257	0.28	0
North Central Rockies forests	NA	41	223550	0.00180663	90	2.985	14.74	0.1
Okanagan dry forests	NA	42	53375	0.00180164	76	5.678	1.5	3
South Central Rockies forests	NA	43	153475	0.00180066	87	1.167	29.74	0
Great Basin montane forests	NA	44	5275	0.00166323	69	0	41.71	0
Montana Valley and Foothill grasslands	NA	45	59025	0.00165638	88	0.958	1.95	0.04
Wyoming Basin shrub steppe	NA	46	24300	0.00165407	78	0.415	1.75	0
Blue Mountains forests	NA	47	55925	0.00163035	74	0.43	8.31	0
Alberta Mountain forests	NA	48	35900	0.00152092	82	1.104	42.62	0
Western short grasslands	NA	49	30925	0.00148552	85	0.733	0.49	0
Fraser Plateau and Basin complex	NA	50	137325	0.00146902	75	6.247	4.62	0.13
Appalachian-Blue Ridge forests	NA	51	153100	0.00130347	78	1.648	4.08	0
Sierra Juarez and San Pedro Martir pine-oak forests	NA	52	1950	0.001279	39	0.003	11.54	0
Appalachian mixed mesophytic forests	NA	53	189825	0.00122076	75	2.02	1.57	0
Southeastern mixed forests	NA	54	311625	0.00119491	65	4.093	0.38	0
Palouse grasslands	NA	55	28875	0.00117265	73	0.62	3.72	0
Ozark Mountain forests	NA	56	55775	0.00114768	51	3.981	14.79	0
Alberta-British Columbia foothills forests	NA	57	120575	0.000993728	80	3.745	0.19	0.02
Eastern Great Lakes lowland forests	NA	58	92575	0.000959657	70	0.721	0.14	0.68
Canadian Aspen forests and parklands	NA	59	342175	0.00094577	96	0.891	0.83	2.58
Central British Columbia Mountain forests	NA	60	64450	0.000925344	67	1.74	1.28	0
Puget lowland forests	NA	61	19700	0.000881592	56	2.766	0.13	2.03
Central U.S. hardwood forests	NA	62	201575	0.000798969	54	0.685	2.69	0
Middle Atlantic coastal forests	NA	63	90375	0.000798969	52	1.566	2.07	0
Edwards Plateau savanna	NA	64	33750	0.000785257	41	0.157	0.3	0
Texas blackland prairies	NA	65	5975	0.000778395	49	0.125	0	0
Piney Woods forests	NA	66	133750	0.000777625	49	9.659	3.98	0
Southeastern conifer forests	NA	67	171475	0.00074289	48	3.558	3.19	0
Willamette Valley forests	NA	68	8300	0.000735751	39	3.41	0	0
Mississippi lowland forests	NA	69	45675	0.000724798	49	0.912	4.6	0
Central forest-grasslands transition	NA	70	78300	0.00071464	60	0.306	1.02	0
Northern Cordillera forests	NA	71	200925	0.00069511	59	1.099	3.53	0.01
Northeastern coastal forests	NA	72	80450	0.000676962	77	1.018	0.65	0
East Central Texas forests	NA	73	15550	0.000668202	50	0.617	0.32	0
Northern short grasslands	NA	74	123675	0.000655196	81	0.14	1.01	0.63
Northern transitional alpine forests	NA	75	19850	0.000638296	47	0.547	1.01	0
Atlantic coastal pine barrens	NA	76	7625	0.000621046	51	0.806	16.72	0
Pacific Coastal Mountain icefields and tundra	NA	77	79150	0.000613945	47	0.103	1.04	0
Florida sand pine scrub	NA	78	2050	0.000594152	36	0.22	3.66	0
Central and Southern mixed grasslands	NA	79	9750	0.000572864	41	0	0.51	0
Central Canadian Shield forests	NA	80	459575	0.000527768	62	5.761	0.86	0
Yukon Interior dry forests	NA	81	61050	0.000503495	40	1.267	0	0.98
Gulf of St. Lawrence lowland forests	NA	82	37375	0.000498822	56	3.967	0	1.87
Mid-Continental Canadian forests	NA	83	366750	0.000496464	68	3.093	6.17	7.52
Midwestern Canadian Shield forests	NA	84	548350	0.00048934	59	2.749	3.48	0
Northern tall grasslands	NA	85	40475	0.000447971	61	0.073	1.48	2.22
Muskwa-Slave Lake forests	NA	86	263725	0.000396657	49	2.104	2.94	3.5
Queen Charlotte Islands	NA	87	8750	0.000395207	16	0.757	8.86	0.86
Northern mixed grasslands	NA	88	46750	0.000381778	78	0	1.28	1.12
Central tall grasslands	NA	89	18175	0.000369231	52	0.003	0.83	0
Interior Yukon-Alaska alpine tundra	NA	90	223850	0.00033701	40	5.108	8.05	0.03
Southern Hudson Bay taiga	NA	91	355150	0.000336323	44	1.436	4.66	2.2
Northwest Territories taiga	NA	92	309925	0.000331727	42	0.616	3.25	1.4
Alaska-St. Elias Range tundra	NA	93	103000	0.000288657	37	0.211	4.93	0
Cook Inlet taiga	NA	94	27175	0.000285064	25	0.271	12.97	0
Nebraska Sand Hills mixed grasslands	NA	95	1575	0.000263087	22	0	3.17	0
Newfoundland Highland forests	NA	96	16275	0.000262961	35	0.652	0	0
Northern Canadian Shield taiga	NA	97	482725	0.000259221	36	0.981	0.74	0.42
Interior Alaska-Yukon lowland taiga	NA	98	403675	0.000239584	25	3.17	18.09	1.35
Copper Plateau taiga	NA	99	17525	0.000218502	30	0.144	11.55	0
Beringia lowland tundra	NA	100	40200	0.000187237	21	0.074	2.11	0
Alaska Peninsula montane taiga	NA	101	3125	0.000181236	14	0	5.6	0
Brooks-British Range tundra	NA	102	78925	0.000167241	24	0.176	3.07	0
Beringia upland tundra	NA	103	27850	0.00013911	19	0	0	0
Eastern Canadian Shield taiga	NA	104	698500	0.000134902	22	0.719	0	0.12
South Avalon-Burin oceanic barrens	NA	105	1175	0.000123409	25	0	0	2.13
Low Arctic tundra	NA	106	39100	9.98336e-05	17	0.607	3.2	2.49
Arctic coastal tundra	NA	107	14825	8.70157e-05	12	0.011	0	6.58
Arctic foothills tundra	NA	108	26225	4.8866e-05	13	0	3.43	0.19
Torngat Mountain tundra	NA	109	29725	4.27408e-05	5	0	0	0
Middle Arctic tundra	NA	110	425	8.87934e-06	1	0	0	0
Cordillera La Costa montane forests	NT	1	12975	1.34014	374	1.776	36.8	38.54
Northwestern Andean montane forests	NT	2	48175	1.33333	709	0.344	14.32	33.63
Jamaican moist forests	NT	3	4550	1.29518	49	0.155	13.19	34.62
Choc¾-DariÚn moist forests	NT	4	67275	1.27377	529	0.607	2.34	10.74
Pernambuco coastal forests	NT	5	400	1.25	148	0	0	18.75
Magdalena Valley montane forests	NT	6	51475	1.18954	643	0.381	2.72	23.85
Windward Islands moist forests	NT	7	1525	1.15943	32	0	0	22.95
Serra do Mar coastal forests	NT	8	56875	1.04188	417	0.526	10.64	33.54
Peruvian Yungas	NT	9	115950	1.01538	908	0.178	11	26.5
Galßpagos Islands scrubland mosaic	NT	10	6825	1.01482	9	0	0	56.04
Caatinga	NT	11	292325	1.00455	318	0.439	4.14	5.42
Trinidad and Tobago moist forests	NT	12	3625	1.00378	142	1.054	0	25.52
Central American dry forests	NT	13	36275	1.00299	376	0.189	0.69	7.72
Cerrado	NT	14	506275	1.00252	671	0.343	4.45	10.91
Llanos	NT	15	71975	1	571	0.103	2.29	6.22
Puerto Rican moist forests	NT	16	1900	0.983759	30	0.095	2.63	17.11
Eastern Panamanian montane forests	NT	17	3050	0.821721	381	0.054	9.02	59.02
Mara±¾n dry forests	NT	18	6850	0.616659	469	0.14	0	16.79
Leeward Islands moist forests	NT	19	450	0.596078	22	0	0	66.67
La Costa xeric shrublands	NT	20	17900	0.522999	383	0.519	18.02	21.65
Sierra Madre del Sur pine-oak forests	NT	21	57525	0.519265	196	0.465	1.35	0
Cauca Valley montane forests	NT	22	12600	0.516158	562	0.19	4.17	18.45
Ecuadorian dry forests	NT	23	1725	0.511225	243	0	0	7.25
Napo moist forests	NT	24	234875	0.503446	678	0.332	8.72	22.48
Magdalena Valley dry forests	NT	25	16125	0.502494	237	0.022	0	1.24
Santa Marta montane forests	NT	26	3775	0.487451	285	0.423	0	15.23
Yucatßn moist forests	NT	27	68200	0.415974	183	1.491	10.67	0.11
Eastern Cordillera real montane forests	NT	28	77350	0.410518	924	0.328	13.54	37.65
Caribbean shrublands	NT	29	750	0.384042	35	0	0	0
Bahia coastal forests	NT	30	42325	0.3799	401	1.08	10.16	14.24
Santa Marta pßramo	NT	31	925	0.340829	129	0	0	0
PetÚn-Veracruz moist forests	NT	32	115950	0.339562	361	1.703	29.93	31.95
Caatinga Enclaves moist forests	NT	33	4600	0.329148	138	1.024	21.2	34.78
Pernambuco interior forests	NT	34	1500	0.312539	183	0	5	13.33
Lesser Antillean dry forests	NT	35	425	0.311111	156	0	0	11.76
Talamancan montane forests	NT	36	15975	0.282288	486	0.645	44.91	77.93
Puerto Rican dry forests	NT	37	150	0.278517	26	0	16.67	16.67
Costa Rican seasonal moist forests	NT	38	9350	0.276357	393	0.476	5.35	43.32
Tumbes-Piura dry forests	NT	39	18525	0.25131	312	0.022	1.08	11.74
Northern Andean pßramo	NT	40	6575	0.25	570	0.196	19.01	47.91
Cordillera Oriental montane forests	NT	41	48025	0.24236	761	0.398	22.75	22.02
Sin· Valley dry forests	NT	42	1875	0.222209	296	0.035	0	30.67
Central Andean wet puna	NT	43	8875	0.219314	369	0.042	1.41	12.96
Hispaniolan moist forests	NT	44	7900	0.213688	48	0.082	12.03	14.56
Ucayali moist forests	NT	45	111125	0.209435	809	0.703	3.37	22.41
Hispaniolan pine forests	NT	46	7425	0.2056	48	0.309	38.72	35.02
Jamaican dry forests	NT	47	1025	0.20436	42	0.073	0	12.2
Venezuelan Andes montane forests	NT	48	24275	0.179502	430	0.541	36.77	23.38
Sechura desert	NT	49	28075	0.17509	61	0.037	0.09	4.01
Sierra de los Tuxtlas	NT	50	2175	0.174615	174	0.017	20.69	0
Isthmian-Pacific moist forests	NT	51	20350	0.173827	456	0.529	2.83	24.69
Western Ecuador moist forests	NT	52	9025	0.172208	370	0.368	9.7	45.71
Bahamian-Antillean mangroves	NT	53	3150	0.169298	117	0	0.79	36.51
Southern Atlantic mangroves	NT	54	5025	0.151387	419	0.479	18.91	32.84
Cordillera de Merida pßramo	NT	55	1550	0.147835	238	0.426	22.58	87.1
Cordillera Central pßramo	NT	56	4000	0.146999	373	0.118	11.25	24.38
Bahia interior forests	NT	57	35325	0.139448	423	0.293	2.69	4.81
Cuban moist forests	NT	58	8600	0.137055	50	0.144	6.4	24.42
Southern Mesoamerican Pacific mangroves	NT	59	5175	0.124039	270	0.147	0	39.13
Isthmian-Atlantic moist forests	NT	60	51525	0.123993	528	1.384	6.6	39.06
Cuban pine forests	NT	61	3150	0.116998	47	0.226	3.17	9.52
Hispaniolan dry forests	NT	62	5675	0.116311	46	0.104	24.23	18.06
Panamanian dry forests	NT	63	675	0.111751	373	0	0	22.22
South American Pacific mangroves	NT	64	8125	0.105636	393	0.051	0	29.23
Alto Paranß Atlantic forests	NT	65	119850	0.103033	455	0.708	5.94	11.83
Japurß-Solimoes-Negro moist forests	NT	66	264825	0.0951891	536	0.1	26.46	9.43
Madeira-Tapaj¾s moist forests	NT	67	670450	0.0937434	636	3.381	23.48	16.79
Tapaj¾s-Xingu moist forests	NT	68	333000	0.0926088	519	2.31	47.43	13.15
Amazon-Orinoco-Southern Caribbean mangroves	NT	69	28325	0.0909524	675	0.536	33.98	55.6
Maracaibo dry forests	NT	70	3925	0.0896227	280	0.028	6.37	0
Bolivian Yungas	NT	71	85525	0.0886297	730	0.224	43.17	38.44
Lara-Falc¾n dry forests	NT	72	2900	0.0866924	208	0.022	12.07	11.21
Bolivian montane dry forests	NT	73	26450	0.0843606	547	0.135	9.07	15.03
Guajira-Barranquilla xeric scrub	NT	74	1675	0.0780942	244	0.032	7.46	26.87
Cuban wetlands	NT	75	3500	0.0778636	42	0.635	0	76.43
Cuban dry forests	NT	76	8325	0.0763804	54	0.029	0.9	32.13
Southwest Amazon moist forests	NT	77	737825	0.0725682	927	0.644	13.38	21.83
Central American pine-oak forests	NT	78	75450	0.0673971	392	0.417	4.47	10.6
Central American montane forests	NT	79	10700	0.0663467	379	0.365	22.43	40.42
Bahamian pine mosaic	NT	80	1800	0.0659395	21	0	0	16.67
Campos Rupestres montane savanna	NT	81	10000	0.0648079	393	0.27	20	20.25
Sierra Madre de Chiapas moist forests	NT	82	7675	0.0637277	228	0.306	12.05	6.51
Magdalena-Urabß moist forests	NT	83	15375	0.0628956	370	0.081	3.74	6.99
Atlantic dry forests	NT	84	48775	0.0563696	225	0.401	6.87	11.53
Guayaquil flooded grasslands	NT	85	300	0.0550625	162	0	0	0
Cuban cactus scrub	NT	86	1125	0.0549066	41	0	0	28.89
Araucaria moist forests	NT	87	105425	0.0546761	351	0.445	4.53	15.13
Atacama desert	NT	88	500	0.05	1	0	0	0
Pantepui	NT	89	50325	0.0497006	556	0.137	68.5	48.24
Guianan Highlands moist forests	NT	90	144125	0.0490536	579	0.198	63.83	33.53
Enriquillo wetlands	NT	91	200	0.0486203	32	0	0	50
Sinaloan dry forests	NT	92	73275	0.0467352	179	0.453	1.6	0
Guianan savanna	NT	93	51975	0.0458233	541	0.314	13.95	34.34
Cauca Valley dry forests	NT	94	800	0.0440677	329	0	0	0
Veracruz moist forests	NT	95	22200	0.0439992	201	0.13	6.42	0
Southern Andean Yungas	NT	96	57825	0.043786	262	0.586	8.65	15.39
Atlantic Coast restingas	NT	97	1975	0.0435756	287	0.324	21.52	50.63
Guianan freshwater swamp forests	NT	98	7175	0.0390293	356	0.915	5.57	8.71
Guianan moist forests	NT	99	470475	0.0376526	512	0.238	16.46	25.29
Southern Pacific dry forests	NT	100	26375	0.0364526	303	0.173	0.38	0
Chimalapas montane forests	NT	101	1725	0.0362585	227	0.184	2.9	0
Apure-Villavicencio dry forests	NT	102	18700	0.0360875	533	0.119	17.25	5.61
Chiapas montane forests	NT	103	3925	0.0356021	288	0.388	5.1	1.91
Chiapas Depression dry forests	NT	104	2775	0.0339056	260	0.041	3.6	18.92
Catatumbo moist forests	NT	105	7050	0.0324971	326	0.155	33.69	17.02
Central Andean puna	NT	106	5175	0.0322646	264	0.075	23.67	26.57
Sierra Madre de Oaxaca pine-oak forests	NT	107	13525	0.0317863	315	0.406	5.18	0
Veracruz montane forests	NT	108	3175	0.0317428	177	0.31	6.3	0
Guianan piedmont and lowland moist forests	NT	109	226925	0.0295531	570	0.4	64.82	24.7
Central American Atlantic moist forests	NT	110	83100	0.0251323	384	1.917	12.94	17.24
Oaxacan montane forests	NT	111	6000	0.0250563	290	0.434	0	0
Central Andean dry puna	NT	112	225	0.024652	76	0	0	0
PatÝa Valley dry forests	NT	113	125	0.0239798	132	0	0	0
Paraguana xeric scrub	NT	114	3400	0.0217877	281	0.143	13.24	0
Uruguayan savanna	NT	115	47475	0.021116	229	0.029	0.58	19.85
Beni savanna	NT	116	73075	0.0208333	513	0.36	3.63	15.6
Mesoamerican Gulf-Caribbean mangroves	NT	117	18875	0.0207869	364	0.227	3.31	23.31
Valdivian temperate forests	NT	118	159925	0.0192383	27	0.695	17.85	9.55
Dry Chaco	NT	119	554075	0.018963	345	1.917	6.73	13.39
Motagua Valley thornscrub	NT	120	350	0.0177838	265	0	7.14	92.86
Araya and Paria xeric scrub	NT	121	2025	0.0175699	220	0.086	0	8.64
Balsas dry forests	NT	122	50525	0.0170791	217	0.381	4.75	0
Trans-Mexican Volcanic Belt pine-oak forests	NT	123	78875	0.0156202	255	0.398	4.53	0
Jalisco dry forests	NT	124	13075	0.0151922	176	0.176	0.76	0
Tehuacßn Valley matorral	NT	125	9625	0.0147216	161	0.321	16.62	0
Chiquitano dry forests	NT	126	207225	0.0125349	476	0.698	14.89	18.05
Miskito pine forests	NT	127	17325	0.0122444	225	1.354	0.29	10.68
Monte Alegre varzeß	NT	128	63425	0.0119201	602	0.625	15.14	19.67
Iquitos varzeß	NT	129	112550	0.011251	642	0.682	18.7	23.32
Uatuma-Trombetas moist forests	NT	130	464225	0.0111827	571	0.383	39.4	8.96
Pantanal	NT	131	102950	0.0110736	331	0.498	13.23	27.12
Belizian pine forests	NT	132	2850	0.0109881	211	4.661	31.58	85.96
Xingu-Tocantins-Araguaia moist forests	NT	133	235250	0.0104911	459	5.838	6.41	22.23
Purus-Madeira moist forests	NT	134	173025	0.0100483	527	1.204	10.16	15.34
Southern Cone Mesopotamian savanna	NT	135	16850	0.00998273	167	0.186	0.15	20.77
Gurupa varzeß	NT	136	8675	0.00978804	460	0.655	30.84	90.2
Tocantins/Pindare moist forests	NT	137	139875	0.00906421	399	3.743	9.45	33.8
Mato Grosso seasonal forests	NT	138	332125	0.00894014	495	6.078	5.22	5.74
Humid Chaco	NT	139	202750	0.00861492	259	0.619	1.37	11.8
BajÝo dry forests	NT	140	28050	0.00860642	128	0.324	0	0
Rio Negro campinarana	NT	141	92900	0.00812708	514	0.15	13.51	27.77
Negro-Branco moist forests	NT	142	199450	0.00785805	507	0.186	24.58	17.29
Caqueta moist forests	NT	143	174550	0.00780761	483	0.4	14.42	9.17
Purus varzeß	NT	144	176475	0.00767336	569	0.21	22.01	9.8
High Monte	NT	145	325	0.00764477	28	0	23.08	23.08
Pantanos de Centla	NT	146	11650	0.0075036	183	0.267	0	0
Solim§es-Japurß moist forests	NT	147	167325	0.00726825	475	0.094	14.24	1.43
Northern Mesoamerican Pacific mangroves	NT	148	3150	0.00717979	88	0	3.17	0
Orinoco Delta swamp forests	NT	149	28175	0.00717179	353	0.605	31.94	34.61
Low Monte	NT	150	3800	0.00673294	15	0	0	0
Yucatßn dry forests	NT	151	47600	0.00640333	130	0.768	0.63	0
MaranhÒo Babaþu forests	NT	152	83425	0.00632332	316	1.683	7.82	4.32
Espinal	NT	153	24150	0.00604273	94	0.019	0.1	11.9
Patagonian steppe	NT	154	22125	0.0060241	26	0.087	1.92	3.28
Orinoco wetlands	NT	155	5775	0.00580792	232	0.384	9.96	33.77
Sierra de la Laguna pine-oak forests	NT	156	1075	0.00576453	21	0.257	58.14	0
Sierra de la Laguna dry forests	NT	157	2450	0.00565262	18	0.228	16.33	0
San Lucan xeric scrub	NT	158	875	0.00558305	14	0	2.86	0
Chilean matorral	NT	159	10975	0.00516687	23	0.21	0	0
Juruß-Purus moist forests	NT	160	241125	0.0049133	479	0.081	15.86	0.74
Veracruz dry forests	NT	161	4050	0.00469301	156	0.238	0	0
Maraj¾ varzeß	NT	162	79975	0.00427304	487	0.571	49.89	53.74
Magellanic subpolar forests	NT	163	50725	0.00420631	21	0.104	10.25	5.08
Paranß flooded savanna	NT	164	14975	0.00262852	131	0.14	0	39.07
Northeastern Brazil restingas	NT	165	2200	0.00183606	166	0.201	20.45	17.05
Humid Pampas	NT	166	7000	0.00169471	58	0.003	0.36	14.29
Southern Andean steppe	NT	167	325	0.000593903	5	0	0	0
Everglades	NT	168	1100	0.000512122	29	0.083	0	0
Hawaii tropical moist forests	OC	1	4975	4.00917	23	0.221	12.06	0
Palau tropical moist forests	OC	2	200	2.55018	11	0	0	50
Fiji tropical moist forests	OC	3	9000	1.18727	19	0.092	0	28.89
Hawaii tropical high shrublands	OC	4	175	0.552004	13	0	14.29	0
Hawaii tropical dry forests	OC	5	1575	0.333333	15	0.034	3.17	0
Fiji tropical dry forests	OC	6	4300	0.0729586	11	0.2	0	9.88
Cook Islands tropical moist forests	OC	7	200	0.0514933	4	0	0	0
Society Islands tropical moist forests	OC	8	1550	0.0475138	5	0	0	0
Carolines tropical moist forests	OC	9	475	0.0401786	8	0	0	0
Marquesas tropical moist forests	OC	10	975	0.031911	7	0	0	0
Marianas tropical dry forests	OC	11	450	0.0165513	5	0	0	0
Tongan tropical moist forests	OC	12	150	0.0142857	2	0	0	0
Samoan tropical moist forests	OC	13	3200	0.00573755	9	0	0	0
Central Polynesian tropical moist forests	OC	14	500	0.00198413	1	0	0	0
Tuamotu tropical moist forests	OC	15	325	0.00162866	3	0	0	7.69
Madeira evergreen forests	PA	1	50	1.00002	7	0	0	50
Cherskii-Kolyma mountain tundra	PA	2	246100	0.5	33	0.178	4.66	0.26
Eastern Mediterranean conifer-sclerophyllous-broadleaf forests	PA	3	8425	0.335322	23	0	0	5.04
Southern Anatolian montane conifer and deciduous forests	PA	4	22900	0.335088	29	0.13	0	19.76
Canary Islands dry woodlands and forests	PA	5	1225	0.138566	10	0	4.08	26.53
Mediterranean conifer and mixed forests	PA	6	13650	0.103449	23	0.246	1.65	5.13
Changjiang Plain evergreen forests	PA	7	181575	0.0777495	121	0.596	5.08	2.81
Eastern Himalayan alpine shrub and meadows	PA	8	36925	0.069732	372	0.291	21.39	51.59
Caledon conifer forests	PA	9	1075	0.0556188	22	0.008	0	4.65
Taiheiyo evergreen forests	PA	10	104100	0.0432725	61	0.575	3.7	1.39
Nihonkai evergreen forests	PA	11	17675	0.0347905	58	0.597	1.41	4.67
Nihonkai montane deciduous forests	PA	12	77325	0.0346614	62	0.52	12.09	14.06
Suiphun-Khanka meadows and forest meadows	PA	13	11275	0.034036	66	0.388	0	0.67
Ussuri broadleaf and mixed forests	PA	14	182525	0.0339692	79	1.236	9.14	2.9
Qionglai-Minshan conifer forests	PA	15	70350	0.0306993	203	0.401	9.56	11.76
Corsican montane broadleaf and mixed forests	PA	16	3050	0.0240225	20	0.672	0	20.49
Tyrrhenian-Adriatic Sclerophyllous and mixed forests	PA	17	16025	0.0240118	29	0.075	7.49	7.96
Azores temperate mixed forests	PA	18	275	0.0227273	4	0	0	9.09
Guizhou Plateau broadleaf and mixed forests	PA	19	210425	0.0223385	207	0.282	3.87	3.74
Yunnan Plateau subtropical evergreen forests	PA	20	168325	0.021883	323	0.322	2.26	4.01
Nujiang Langcang Gorge alpine conifer and mixed forests	PA	21	55025	0.0183177	314	0.432	19.54	18.22
Sichuan Basin evergreen broadleaf forests	PA	22	11975	0.0175336	146	0.03	1.46	1.67
Northeastern Himalayan subalpine conifer forests	PA	23	31750	0.0175294	299	0.296	14.02	59.69
Northwestern Himalayan alpine shrub and meadows	PA	24	14975	0.0163927	151	0.291	2	11.35
Qin Ling Mountains deciduous forests	PA	25	93250	0.0156639	134	0.32	7.83	5.01
Southeast Tibet shrublands and meadows	PA	26	114225	0.0155029	194	0.187	9.41	17.97
Qilian Mountains conifer forests	PA	27	5400	0.0153169	77	0.172	6.48	45.37
Western Himalayan alpine shrub and Meadows	PA	28	14000	0.0139831	213	0.655	11.79	22.86
Hengduan Mountains subalpine conifer forests	PA	29	80725	0.0108311	203	0.447	5.54	7.03
Daba Mountains evergreen forests	PA	30	117325	0.0106209	150	0.244	3.84	1.56
Southern Korea evergreen forests	PA	31	8925	0.0100765	44	0.11	0.84	0
Emin Valley steppe	PA	32	3650	0.0100525	27	0	0	5.48
Altai montane forest and forest steppe	PA	33	36275	0.0100431	46	0.188	2.89	9.44
Central Asian riparian woodlands	PA	34	1475	0.0097586	14	0.012	22.03	100
Junggar Basin semi-desert	PA	35	950	0.00973388	35	0	0	0
Tian Shan foothill arid steppe	PA	36	3800	0.00972606	37	0.001	12.5	4.61
Altai alpine meadow and tundra	PA	37	16700	0.00965882	46	0.052	5.09	2.1
Hindu Kush alpine meadow	PA	38	1575	0.00918081	54	0	0	31.75
Baluchistan xeric woodlands	PA	39	51350	0.00841724	94	0.083	0.05	2.73
East Afghan montane conifer forests	PA	40	4875	0.00800046	53	0.005	0	11.28
Sulaiman Range alpine meadows	PA	41	7450	0.00795933	47	0.062	0.67	1.34
Central China loess plateau mixed forests	PA	42	156025	0.00667104	111	0.074	1.27	2.77
Taiheiyo montane deciduous forests	PA	43	39800	0.0058895	57	0.585	9.23	4.08
Celtic broadleaf forests	PA	44	4825	0.00555914	25	0.005	0	16.58
Huang He Plain mixed forests	PA	45	50025	0.00534727	103	0.014	2.45	6.65
Honshu alpine conifer forests	PA	46	10650	0.00530284	59	0.462	27	35.68
Central Afghan Mountains xeric woodlands	PA	47	625	0.00524647	36	0	0	0
Changbai Mountains mixed forests	PA	48	92625	0.00431941	71	0.767	2.81	4.75
Manchurian mixed forests	PA	49	426625	0.00424868	88	0.958	4.92	1.37
Mediterranean woodlands and forests	PA	50	50825	0.00351232	22	0.028	0.84	3.2
Mediterranean dry woodlands and steppe	PA	51	250	0.00338565	15	0	0	0
Mediterranean acacia-argania dry woodlands and succulent thickets	PA	52	1150	0.00330979	16	0	0	0
Karakoram-West Tibetan Plateau alpine steppe	PA	53	325	0.00315905	44	0	0	7.69
Yarlung Tsangpo arid steppe	PA	54	2300	0.00311207	40	0.2	0	0
Tibetan Plateau alpine shrublands and meadows	PA	55	3200	0.00266077	34	0.002	3.91	0
Aegean and Western Turkey sclerophyllous and mixed forests	PA	56	37025	0.00241706	36	0.071	0.95	21.07
Anatolian conifer and deciduous mixed forests	PA	57	21550	0.00241409	35	0.074	0	14.62
Ordos Plateau steppe	PA	58	3875	0.00217977	46	0.06	15.48	25.81
Mongolian-Manchurian grassland	PA	59	68925	0.00216985	77	0.243	1.38	8.09
Caucasus mixed forests	PA	60	79775	0.00189905	42	0.205	7.58	6.86
Crimean Submediterranean forest complex	PA	61	20100	0.00186123	40	0.384	8.71	0.12
Eastern Anatolian deciduous forests	PA	62	1475	0.00178008	20	0	0	0
Iberian sclerophyllous and semi-deciduous forests	PA	63	73775	0.00175298	34	0.301	3.69	42.87
Northwest Iberian montane forests	PA	64	42900	0.00175038	33	1.813	5.07	33.51
Southwest Iberian Mediterranean sclerophyllous and mixed forests	PA	65	38825	0.00169645	29	3.296	7.02	20.61
Iberian conifer forests	PA	66	16400	0.00168822	32	0.328	9.45	47.41
Northern Anatolian conifer and deciduous forests	PA	67	41350	0.00168272	38	0.149	0	4.35
Euxine-Colchic broadleaf forests	PA	68	49800	0.00162175	40	0.364	0.35	6.17
Hokkaido montane conifer forests	PA	69	39250	0.00146556	49	0.417	10.83	23.69
Eastern Anatolian montane steppe	PA	70	1400	0.00141215	36	0.001	0	16.07
Sakhalin Island taiga	PA	71	64725	0.00136892	54	0.867	3.71	0.73
Hokkaido deciduous forests	PA	72	22050	0.00133678	48	0.445	1.36	3.97
South Sakhalin-Kurile mixed forests	PA	73	11450	0.0013356	55	0.169	12.01	13.32
Tian Shan montane steppe and meadows	PA	74	29000	0.00108759	37	0.068	4.31	4.48
Okhotsk-Manchurian taiga	PA	75	386400	0.00106796	80	2.259	6.7	0.72
Amur meadow steppe	PA	76	40925	0.000977452	71	0.401	8.92	5.74
Gissaro-Alai open woodlands	PA	77	1550	0.000919153	30	0	1.61	0
Paropamisus xeric woodlands	PA	78	175	0.000894841	26	0	0	0
Afghan Mountains semi-desert	PA	79	100	0.000885812	24	0	0	0
Central Anatolian steppe and woodlands	PA	80	900	0.000870243	30	0	0	33.33
Central Korean deciduous forests	PA	81	77400	0.000858787	58	0.333	2.65	0.45
Rodope montane mixed forests	PA	82	28450	0.000826327	39	1.427	9.14	44.38
Balkan mixed forests	PA	83	83400	0.000813735	43	0.494	3.36	20.65
Trans-Baikal Bald Mountain tundra	PA	84	182975	0.000791199	75	0.841	5.41	1.01
Northeast China Plain deciduous forests	PA	85	31725	0.000745326	71	0.018	1.1	3.47
Tian Shan montane conifer forests	PA	86	3925	0.00072928	36	0.001	8.92	2.55
Pamir alpine desert and tundra	PA	87	2750	0.000725389	16	0	1.82	0
Pindus Mountains mixed forests	PA	88	22100	0.000714665	37	0.177	6.67	14.93
Sayan Intermontane steppe	PA	89	25525	0.00070009	49	3.511	12.05	0.1
Sayan montane conifer forests	PA	90	331050	0.000661496	62	1.054	15.36	4.34
Great Lakes Basin desert steppe	PA	91	9625	0.000646807	45	0.368	2.86	0.78
Illyrian deciduous forests	PA	92	10625	0.000627514	37	0.049	1.65	17.41
Carpathian montane forests	PA	93	108550	0.000619534	44	0.977	13.24	20.84
Pannonian mixed forests	PA	94	142400	0.000612601	43	0.345	7.6	17.36
Alps conifer and mixed forests	PA	95	138450	0.000605811	38	0.637	6.57	16.92
Western European broadleaf forests	PA	96	276150	0.000585727	43	0.529	26.96	15.01
Central European mixed forests	PA	97	292250	0.000576333	46	0.233	4.44	14.59
Pyrenees conifer and mixed forests	PA	98	24775	0.000576105	32	1.183	12.71	44.2
Pontic steppe	PA	99	30350	0.000575773	50	0.033	4.37	17.38
Northeastern Spain and Southern France Mediterranean forests	PA	100	55300	0.00056032	33	0.407	13.38	16.77
Azerbaijan shrub desert and steppe	PA	101	1250	0.000555941	35	0	4	6
Dinaric Mountains mixed forests	PA	102	45275	0.000552474	36	0.607	2.82	4.75
North Tibetan Plateau-Kunlun Mountains alpine desert	PA	103	4375	0.000530738	5	0	0	0
Po Basin mixed forests	PA	104	3225	0.000525363	34	0.015	1.55	13.95
Cantabrian mixed forests	PA	105	76175	0.000508609	33	2.064	2.69	15.52
Da Hinggan-Dzhagdy Mountains conifer forests	PA	106	242550	0.000501298	66	1.895	3.27	1.79
East Siberian taiga	PA	107	3689975	0.000499485	75	1.438	3.36	0.1
Northeast Siberian taiga	PA	108	873650	0.000482174	38	0.297	5.25	0.08
Central Tibetan Plateau alpine steppe	PA	109	100	0.000477816	24	0	0	0
Italian sclerophyllous and semi-deciduous forests	PA	110	46775	0.000477458	33	0.212	7.59	10.48
Appenine deciduous montane forests	PA	111	13975	0.000472324	31	0.536	21.29	34.7
Kamchatka-Kurile meadows and sparse forests	PA	112	82175	0.000471928	37	0.104	2.31	5.42
Kamchatka Mountain tundra and forest tundra	PA	113	52550	0.000459757	23	0.065	3.85	0.1
Baltic mixed forests	PA	114	33850	0.000437375	39	0.222	8.64	31.54
Bohai Sea saline meadow	PA	115	2250	0.00043321	34	0	6.67	25.56
East European forest steppe	PA	116	193400	0.000432968	50	0.087	4.73	8.57
Sayan Alpine meadows and tundra	PA	117	56150	0.000420862	57	0.317	12.38	1.78
Trans-Baikal conifer forests	PA	118	185500	0.000420476	53	4.801	15.69	7.8
Daurian forest steppe	PA	119	66600	0.00041684	55	0.672	3.3	0.75
Zagros Mountains forest steppe	PA	120	7375	0.000401363	17	0	3.05	3.39
Atlantic mixed forests	PA	121	53875	0.000400075	40	0.16	7.33	12.85
Caspian Hyrcanian mixed forests	PA	122	22250	0.000388594	34	0.134	8.43	12.02
Elburz Range forest steppe	PA	123	2125	0.00038624	30	0.003	3.53	8.24
Selenge-Orkhon forest steppe	PA	124	56450	0.00038508	53	0.597	3.41	1.15
Sarmatic mixed forests	PA	125	664625	0.00036914	51	0.819	4.88	4.1
South Siberian forest steppe	PA	126	103400	0.000361702	57	0.785	4.93	0.07
Nenjiang River grassland	PA	127	375	0.000354681	40	0	0	0
Kazakh forest steppe	PA	128	89075	0.00033087	55	0.13	10.19	9.43
Ural montane forests and tundra	PA	129	171250	0.000329426	48	1.096	19.14	10.26
Scandinavian and Russian taiga	PA	130	2070675	0.000321552	51	1.488	4.29	2.52
South Appenine mixed montane forests	PA	131	8875	0.000320968	26	0.239	34.37	22.25
West Siberian taiga	PA	132	1427700	0.000313248	60	0.542	4.83	1.36
Western Siberian hemiboreal forests	PA	133	153025	0.000292265	57	0.565	5.77	1.88
Bering tundra	PA	134	51450	0.000280954	14	0.001	3.6	1.02
Altai steppe and semi-desert	PA	135	3200	0.000260441	40	0	0	0
Scandinavian Montane Birch forest and grasslands	PA	136	110775	0.00025637	35	0.274	10.38	7.7
Kazakh steppe	PA	137	25075	0.000256113	45	0.137	2.19	63.41
Kazakh upland	PA	138	6200	0.00023816	36	0.242	0	0
Yellow Sea saline meadow	PA	139	1600	0.000228616	29	0	0	25
Scandinavian coastal conifer forests	PA	140	10725	0.000224627	30	1.26	0	0.23
Registan-North Pakistan sandy desert	PA	141	50	0.000220046	5	0	0	0
Crete Mediterranean forests	PA	142	450	0.000204288	8	0	0	22.22
Taklimakan desert	PA	143	100	0.00017659	3	0	0	0
Khangai Mountains conifer forests	PA	144	1125	0.000173349	23	0.919	15.56	0
Khangai Mountains alpine meadow	PA	145	450	0.000167377	21	0	5.56	5.56
Kopet Dag semi-desert	PA	146	150	0.000165254	18	0	0	0
Northwest Russian-Novaya Zemlya tundra	PA	147	41625	0.00015656	30	0.093	7.15	11.59
Ghorat-Hazarajat alpine meadow	PA	148	25	0.00014987	14	0	0	0
Kamchatka-Kurile taiga	PA	149	12200	0.000149141	21	0.471	0	0.2
Taimyr-Central Siberian tundra	PA	150	33575	0.00014544	21	0.007	0	0
Cyprus Mediterranean forests	PA	151	2025	0.000134763	14	0.004	4.94	48.15
Southeastern Iberian shrubs and woodlands	PA	152	725	0.000131987	17	0.004	0	55.17
Central Persian desert basins	PA	153	175	0.000105173	10	0	0	0
Chukchi Peninsula tundra	PA	154	1825	9.02042e-05	10	0	0	0
Yamal-Gydan tundra	PA	155	12925	8.56184e-05	19	0.003	0	0.39
North Atlantic moist mixed forests	PA	156	800	7.2352e-05	20	0	0	3.13
English Lowlands beech forests	PA	157	100	6.93599e-05	26	0	0	0
Kola Peninsula tundra	PA	158	5950	6.72528e-05	18	0.002	0.42	0
Alashan Plateau semi-desert	PA	159	75	6.2383e-05	5	0	0	0
Northeast Siberian coastal tundra	PA	160	9500	4.19318e-05	6	0.254	2.37	0
Mesopotamian shrub desert	PA	161	150	2.88824e-05	2	0	0	100
